# Supplementary material
Source: Springer Nature journal article supplement (https://www.springermedizin.de/resource/supplementary/12889_2011_4687_MOESM1_ESM.pdf/9492956)
Supplement: MOESM1 [file 9492956]

2374 cancer patients

Weighted %

>=100 cigarettes during lifetime

No  
41.1% (n=994)

Yes  
58.9% (n=1375)

Ever smoke regularly

No  
4.5% (n=61)

Yes  
95.5% (n=1308)

Started smoking before cancer diagnosis

No  
3.1% (n=40)

Yes  
96.9% (n=1260)

Smoke when cancer was diagnosed

No  
49.4% (n=691)

Yes  
50.6% (n=566)

Quit smoking after cancer diagnosis

No  
63.9% (n=322)

Yes  
36.1% (n=244)
